# Supplementary material
Source: Springer Nature journal article supplement (https://www.springermedizin.de/resource/supplementary/12958_2009_598_MOESM2_ESM.pdf/9568064)

Aging mice

Adult mice

*CatSper1*

*CatSper2*

*CatSper3*

*CatSper4*

*CatSper1*

*CatSper2*

*CatSper3*

*CatSper4*

600bp

500bp

400bp

300bp

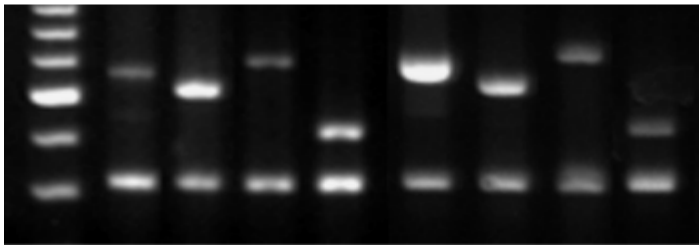

Supplement: MOESM2 [file 9568064]
